# Supplementary material for: A rapid and accurate method of mapping invasive Tamarix genotypes using Sentinel-2 images
Source: PeerJ. 2023 Apr 17;11:e15027. doi: 10.7717/peerj.15027 (PMC10117385; doi:10.7717/peerj.15027)
Supplement: Supplemental Information 1 [file peerj-11-15027-s001.xls]

## Sheet: Ground Truthing Points
FID	LULC	Codes	POINT_X	POINT_Y
0	Agriculture	A	2.38768e+06	-3.96818e+06
1	Agriculture	A	2.38736e+06	-3.96819e+06
2	Agriculture	A	2.38733e+06	-3.96851e+06
3	Agriculture	A	2.38757e+06	-3.96858e+06
4	Agriculture	A	2.38776e+06	-3.96859e+06
5	Agriculture	A	2.38799e+06	-3.96872e+06
6	Agriculture	A	2.3878e+06	-3.96829e+06
7	Agriculture	A	2.38557e+06	-3.96901e+06
8	Agriculture	A	2.39406e+06	-3.969e+06
9	Agriculture	A	2.39402e+06	-3.96925e+06
10	Agriculture	A	2.39393e+06	-3.96956e+06
11	Agriculture	A	2.39391e+06	-3.96981e+06
12	Agriculture	A	2.38507e+06	-3.97033e+06
13	Agriculture	A	2.38481e+06	-3.97023e+06
14	Agriculture	A	2.38634e+06	-3.97009e+06
15	Agriculture	A	2.3864e+06	-3.97019e+06
16	Agriculture	A	2.38623e+06	-3.97055e+06
17	Agriculture	A	2.38611e+06	-3.97038e+06
18	Agriculture	A	2.38897e+06	-3.97037e+06
19	Agriculture	A	2.39019e+06	-3.97026e+06
20	Agriculture	A	2.39049e+06	-3.97013e+06
21	Agriculture	A	2.39369e+06	-3.97012e+06
22	Agriculture	A	2.39348e+06	-3.97006e+06
23	Agriculture	A	2.3932e+06	-3.96996e+06
24	Agriculture	A	2.38879e+06	-3.97089e+06
25	Agriculture	A	2.38877e+06	-3.97077e+06
26	Agriculture	A	2.3879e+06	-3.97091e+06
27	Agriculture	A	2.38984e+06	-3.97071e+06
28	Agriculture	A	2.38976e+06	-3.97068e+06
29	Agriculture	A	2.39054e+06	-3.97279e+06
30	Agriculture	A	2.39332e+06	-3.97255e+06
31	Agriculture	A	2.3924e+06	-3.97305e+06
32	Agriculture	A	2.39254e+06	-3.97287e+06
33	Agriculture	A	2.39227e+06	-3.97299e+06
34	Agriculture	A	2.39232e+06	-3.97327e+06
35	Agriculture	A	2.39254e+06	-3.97335e+06
36	Agriculture	A	2.39155e+06	-3.97337e+06
37	Agriculture	A	2.39121e+06	-3.97318e+06
38	Agriculture	A	2.39086e+06	-3.97301e+06
39	Agriculture	A	2.39077e+06	-3.97283e+06
40	Agriculture	A	2.39312e+06	-3.97314e+06
41	Agriculture	A	2.39322e+06	-3.97289e+06
42	Agriculture	A	2.39262e+06	-3.97352e+06
43	Agriculture	A	2.39243e+06	-3.97353e+06
44	Agriculture	A	2.39241e+06	-3.9737e+06
45	Agriculture	A	2.39236e+06	-3.97394e+06
46	Agriculture	A	2.39151e+06	-3.97363e+06
47	Agriculture	A	2.39219e+06	-3.974e+06
48	Agriculture	A	2.39269e+06	-3.97417e+06
49	Agriculture	A	2.39343e+06	-3.97448e+06
50	Agriculture	A	2.46734e+06	-3.99005e+06
51	Agriculture	A	2.46663e+06	-3.99025e+06
52	Agriculture	A	2.46699e+06	-3.99105e+06
53	Agriculture	A	2.46744e+06	-3.99069e+06
54	Agriculture	A	2.46715e+06	-3.99054e+06
55	Agriculture	A	2.46794e+06	-3.99075e+06
56	Agriculture	A	2.41502e+06	-3.9921e+06
57	Agriculture	A	2.41533e+06	-3.99188e+06
58	Agriculture	A	2.41572e+06	-3.99178e+06
59	Agriculture	A	2.41596e+06	-3.99207e+06
60	Agriculture	A	2.41461e+06	-3.992e+06
61	Agriculture	A	2.41416e+06	-3.99218e+06
62	Agriculture	A	2.46751e+06	-3.99168e+06
63	Agriculture	A	2.40437e+06	-3.99285e+06
64	Agriculture	A	2.40397e+06	-3.99284e+06
65	Agriculture	A	2.41368e+06	-3.99277e+06
66	Agriculture	A	2.4153e+06	-3.99253e+06
67	Agriculture	A	2.41609e+06	-3.99257e+06
68	Agriculture	A	2.41628e+06	-3.99239e+06
69	Agriculture	A	2.41337e+06	-3.99223e+06
70	Agriculture	A	2.41246e+06	-3.9925e+06
71	Agriculture	A	2.38254e+06	-3.99345e+06
72	Agriculture	A	2.37909e+06	-3.99352e+06
73	Agriculture	A	2.40305e+06	-3.99343e+06
74	Agriculture	A	2.40363e+06	-3.99324e+06
75	Agriculture	A	2.40524e+06	-3.99332e+06
76	Agriculture	A	2.41329e+06	-3.99291e+06
77	Agriculture	A	2.46769e+06	-3.9924e+06
78	Agriculture	A	2.38911e+06	-3.99413e+06
79	Agriculture	A	2.38243e+06	-3.99368e+06
80	Agriculture	A	2.38513e+06	-3.99401e+06
81	Agriculture	A	2.38493e+06	-3.99408e+06
82	Agriculture	A	2.39267e+06	-3.99392e+06
83	Agriculture	A	2.39305e+06	-3.99404e+06
84	Agriculture	A	2.39355e+06	-3.99413e+06
85	Agriculture	A	2.39384e+06	-3.99364e+06
86	Agriculture	A	2.37911e+06	-3.99384e+06
87	Agriculture	A	2.38277e+06	-3.99414e+06
88	Agriculture	A	2.40384e+06	-3.99352e+06
89	Agriculture	A	2.40411e+06	-3.99388e+06
90	Agriculture	A	2.40157e+06	-3.9937e+06
91	Agriculture	A	2.40285e+06	-3.99385e+06
92	Agriculture	A	2.40488e+06	-3.99367e+06
93	Agriculture	A	2.39677e+06	-3.99362e+06
94	Agriculture	A	2.39665e+06	-3.99385e+06
95	Agriculture	A	2.39694e+06	-3.99384e+06
96	Agriculture	A	2.39616e+06	-3.99376e+06
97	Agriculture	A	2.39582e+06	-3.9939e+06
98	Agriculture	A	2.39573e+06	-3.9936e+06
99	Agriculture	A	2.39542e+06	-3.99395e+06
100	Agriculture	A	2.39514e+06	-3.99388e+06
101	Agriculture	A	2.39616e+06	-3.99376e+06
102	Agriculture	A	2.39597e+06	-3.99372e+06
103	Agriculture	A	2.4121e+06	-3.9936e+06
104	Agriculture	A	2.46776e+06	-3.99332e+06
105	Agriculture	A	2.38893e+06	-3.99464e+06
106	Agriculture	A	2.39303e+06	-3.99446e+06
107	Agriculture	A	2.39353e+06	-3.99457e+06
108	Agriculture	A	2.37917e+06	-3.99431e+06
109	Agriculture	A	2.38244e+06	-3.99465e+06
110	Agriculture	A	2.40367e+06	-3.99415e+06
111	Agriculture	A	2.40268e+06	-3.99451e+06
112	Agriculture	A	2.40214e+06	-3.99449e+06
113	Agriculture	A	2.40137e+06	-3.99425e+06
114	Agriculture	A	2.40179e+06	-3.99417e+06
115	Agriculture	A	2.40458e+06	-3.99453e+06
116	Agriculture	A	2.40524e+06	-3.99448e+06
117	Agriculture	A	2.40547e+06	-3.99429e+06
118	Agriculture	A	2.39901e+06	-3.99426e+06
119	Agriculture	A	2.39834e+06	-3.99434e+06
120	Agriculture	A	2.3986e+06	-3.99462e+06
121	Agriculture	A	2.39683e+06	-3.99459e+06
122	Agriculture	A	2.39659e+06	-3.99431e+06
123	Agriculture	A	2.40975e+06	-3.99441e+06
124	Agriculture	A	2.40889e+06	-3.99421e+06
125	Agriculture	A	2.40841e+06	-3.9942e+06
126	Agriculture	A	2.40789e+06	-3.99431e+06
127	Agriculture	A	2.40703e+06	-3.99433e+06
128	Agriculture	A	2.41237e+06	-3.99413e+06
129	Agriculture	A	2.47007e+06	-3.99371e+06
130	Agriculture	A	2.40386e+06	-3.99465e+06
131	Agriculture	A	2.40328e+06	-3.99482e+06
132	Agriculture	A	2.40217e+06	-3.99477e+06
133	Agriculture	A	2.40131e+06	-3.99474e+06
134	Agriculture	A	2.405e+06	-3.99471e+06
135	Agriculture	A	2.40539e+06	-3.99471e+06
136	Agriculture	A	2.40491e+06	-3.99499e+06
137	Agriculture	A	2.40368e+06	-3.9951e+06
138	Agriculture	A	2.40288e+06	-3.99515e+06
139	Agriculture	A	2.39891e+06	-3.99472e+06
140	Agriculture	A	2.40616e+06	-3.99514e+06
141	Agriculture	A	2.41364e+06	-3.99505e+06
142	Agriculture	A	2.47981e+06	-3.99413e+06
143	Agriculture	A	2.46804e+06	-3.99423e+06
144	Agriculture	A	2.40467e+06	-3.9953e+06
145	Agriculture	A	2.40411e+06	-3.99533e+06
146	Agriculture	A	2.4072e+06	-3.99529e+06
147	Agriculture	A	2.40591e+06	-3.9952e+06
148	Agriculture	A	2.4804e+06	-3.99454e+06
149	Agriculture	A	2.4774e+06	-3.9947e+06
150	Agriculture	A	2.47679e+06	-3.995e+06
151	Agriculture	A	2.47174e+06	-3.9949e+06
152	Agriculture	A	2.46814e+06	-3.99494e+06
153	Agriculture	A	2.46766e+06	-3.99459e+06
154	Agriculture	A	2.47268e+06	-3.99546e+06
155	Agriculture	A	2.47196e+06	-3.99548e+06
156	Agriculture	A	2.47059e+06	-3.99569e+06
157	Agriculture	A	2.46835e+06	-3.99549e+06
158	Agriculture	A	2.46875e+06	-3.99541e+06
159	Agriculture	A	2.47899e+06	-3.99612e+06
160	Agriculture	A	2.48115e+06	-3.99618e+06
161	Agriculture	A	2.48106e+06	-3.99568e+06
162	Agriculture	A	2.47044e+06	-3.99604e+06
163	Agriculture	A	2.46909e+06	-3.99628e+06
164	Agriculture	A	2.46928e+06	-3.99589e+06
165	Agriculture	A	2.46828e+06	-3.99609e+06
166	Agriculture	A	2.46869e+06	-3.99605e+06
167	Agriculture	A	2.47792e+06	-3.99622e+06
168	Agriculture	A	2.47944e+06	-3.99633e+06
169	Agriculture	A	2.47058e+06	-3.99672e+06
170	Agriculture	A	2.46325e+06	-3.9966e+06
171	Agriculture	A	2.46117e+06	-3.99656e+06
172	Agriculture	A	2.46947e+06	-3.99632e+06
173	Agriculture	A	2.47837e+06	-3.99718e+06
174	Agriculture	A	2.48003e+06	-3.99721e+06
175	Agriculture	A	2.47933e+06	-3.99705e+06
176	Agriculture	A	2.46278e+06	-3.99715e+06
177	Agriculture	A	2.4622e+06	-3.9971e+06
178	Agriculture	A	2.46166e+06	-3.9971e+06
179	Agriculture	A	2.46151e+06	-3.9974e+06
180	Agriculture	A	2.46402e+06	-3.99725e+06
181	Agriculture	A	2.48342e+06	-3.99755e+06
182	Agriculture	A	2.47821e+06	-3.99782e+06
183	Agriculture	A	2.47892e+06	-3.99772e+06
184	Agriculture	A	2.46238e+06	-3.99807e+06
185	Agriculture	A	2.46136e+06	-3.99769e+06
186	Agriculture	A	2.46773e+06	-3.99806e+06
187	Agriculture	A	2.47902e+06	-3.99805e+06
188	Agriculture	A	2.48023e+06	-3.99835e+06
189	Agriculture	A	2.46207e+06	-3.99855e+06
190	Agriculture	A	2.47892e+06	-3.9986e+06
191	Agriculture	A	2.47892e+06	-3.99906e+06
192	Agriculture	A	2.48159e+06	-3.99934e+06
193	Agriculture	A	2.48338e+06	-3.99918e+06
194	Agriculture	A	2.47686e+06	-3.99942e+06
195	Agriculture	A	2.48027e+06	-3.99908e+06
196	Agriculture	A	2.47978e+06	-3.99973e+06
197	Agriculture	A	2.48066e+06	-3.99965e+06
198	Agriculture	A	2.48232e+06	-3.99973e+06
199	Agriculture	A	2.46746e+06	-4.0002e+06
200	Agriculture	A	2.48042e+06	-4.0004e+06
201	Agriculture	A	2.46817e+06	-4.00054e+06
202	Agriculture	A	2.48059e+06	-4.00108e+06
203	Agriculture	A	2.48171e+06	-4.00094e+06
204	Agriculture	A	2.48315e+06	-4.00084e+06
205	Agriculture	A	2.49102e+06	-4.00108e+06
206	Agriculture	A	2.47285e+06	-4.00139e+06
207	Agriculture	A	2.47484e+06	-4.00087e+06
208	Agriculture	A	2.47492e+06	-4.0013e+06
209	Agriculture	A	2.48995e+06	-4.00187e+06
210	Agriculture	A	2.46909e+06	-4.00167e+06
211	Agriculture	A	2.46669e+06	-4.0016e+06
212	Agriculture	A	2.47544e+06	-4.00184e+06
213	Agriculture	A	2.48862e+06	-4.00217e+06
214	Agriculture	A	2.49074e+06	-4.00191e+06
215	Agriculture	A	2.4675e+06	-4.00213e+06
216	Agriculture	A	2.46714e+06	-4.00246e+06
217	Agriculture	A	2.47255e+06	-4.00251e+06
218	Agriculture	A	2.48916e+06	-4.00263e+06
219	Agriculture	A	2.49069e+06	-4.00302e+06
220	Agriculture	A	2.49159e+06	-4.00254e+06
221	Agriculture	A	2.47633e+06	-4.00288e+06
222	Agriculture	A	2.46818e+06	-4.00268e+06
223	Agriculture	A	2.46784e+06	-4.00295e+06
224	Agriculture	A	2.4694e+06	-4.00314e+06
225	Agriculture	A	2.47784e+06	-4.0037e+06
226	Agriculture	A	2.47666e+06	-4.00349e+06
227	Agriculture	A	2.46889e+06	-4.00346e+06
228	Agriculture	A	2.47029e+06	-4.00345e+06
229	Agriculture	A	2.47055e+06	-4.0036e+06
230	Agriculture	A	2.46809e+06	-4.00352e+06
231	Agriculture	A	2.46741e+06	-4.00333e+06
232	Agriculture	A	2.47626e+06	-4.00327e+06
233	Agriculture	A	2.47631e+06	-4.00407e+06
234	Agriculture	A	2.49682e+06	-4.00396e+06
235	Agriculture	A	2.47061e+06	-4.00425e+06
236	Agriculture	A	2.46727e+06	-4.0043e+06
237	Agriculture	A	2.47277e+06	-4.0038e+06
238	Agriculture	A	2.48361e+06	-4.00477e+06
239	Agriculture	A	2.47868e+06	-4.00462e+06
240	Agriculture	A	2.4697e+06	-4.00457e+06
241	Agriculture	A	2.46913e+06	-4.00448e+06
242	Agriculture	A	2.47992e+06	-4.00515e+06
243	Agriculture	A	2.47772e+06	-4.00545e+06
244	Agriculture	A	2.47845e+06	-4.00512e+06
245	Agriculture	A	2.49358e+06	-4.00476e+06
246	Agriculture	A	2.47953e+06	-4.00589e+06
247	Agriculture	A	2.49912e+06	-4.00556e+06
248	Agriculture	A	2.49995e+06	-4.00549e+06
249	Agriculture	A	2.49618e+06	-4.00699e+06
250	Agriculture	A	2.49277e+06	-4.00697e+06
251	Agriculture	A	2.49088e+06	-4.00761e+06
252	Agriculture	A	2.49061e+06	-4.00758e+06
253	Agriculture	A	2.49238e+06	-4.00739e+06
254	Agriculture	A	2.4909e+06	-4.008e+06
255	Agriculture	A	2.49204e+06	-4.00786e+06
256	Agriculture	A	2.49017e+06	-4.00849e+06
257	Agriculture	A	2.49664e+06	-4.00872e+06
258	Agriculture	A	2.47656e+06	-4.00978e+06
259	Agriculture	A	2.49819e+06	-4.00977e+06
260	Agriculture	A	2.49871e+06	-4.00983e+06
261	Agriculture	A	2.49769e+06	-4.00982e+06
262	Agriculture	A	2.49715e+06	-4.00984e+06
263	Agriculture	A	2.48734e+06	-4.01027e+06
264	Agriculture	A	2.48669e+06	-4.01052e+06
265	Agriculture	A	2.49747e+06	-4.00993e+06
266	Bareland	BL	2.42495e+06	-3.80904e+06
267	Bareland	BL	2.43508e+06	-3.80922e+06
268	Bareland	BL	2.4452e+06	-3.80977e+06
269	Bareland	BL	2.43412e+06	-3.81237e+06
270	Bareland	BL	2.42633e+06	-3.81543e+06
271	Bareland	BL	2.42852e+06	-3.81548e+06
272	Bareland	BL	2.39769e+06	-3.81806e+06
273	Bareland	BL	2.43172e+06	-3.81783e+06
274	Bareland	BL	2.40041e+06	-3.81871e+06
275	Bareland	BL	2.40685e+06	-3.81903e+06
276	Bareland	BL	2.43434e+06	-3.82065e+06
277	Bareland	BL	2.40321e+06	-3.8228e+06
278	Bareland	BL	2.40197e+06	-3.82505e+06
279	Bareland	BL	2.40507e+06	-3.82565e+06
280	Bareland	BL	2.40142e+06	-3.82954e+06
281	Bareland	BL	2.43098e+06	-3.83177e+06
282	Bareland	BL	2.34574e+06	-3.83627e+06
283	Bareland	BL	2.42133e+06	-3.83991e+06
284	Bareland	BL	2.42542e+06	-3.8435e+06
285	Bareland	BL	2.40459e+06	-3.84798e+06
286	Bareland	BL	2.41328e+06	-3.84767e+06
287	Bareland	BL	2.40031e+06	-3.85304e+06
288	Bareland	BL	2.42307e+06	-3.85293e+06
289	Bareland	BL	2.39863e+06	-3.85396e+06
290	Bareland	BL	2.42453e+06	-3.85904e+06
291	Bareland	BL	2.43733e+06	-3.85954e+06
292	Bareland	BL	2.43293e+06	-3.86197e+06
293	Bareland	BL	2.43532e+06	-3.87584e+06
294	Bareland	BL	2.43943e+06	-3.87883e+06
295	Bareland	BL	2.4398e+06	-3.88183e+06
296	Bareland	BL	2.42088e+06	-3.88893e+06
297	Bareland	BL	2.41691e+06	-3.88981e+06
298	Bareland	BL	2.41921e+06	-3.89332e+06
299	Bareland	BL	2.45563e+06	-3.90041e+06
300	Bareland	BL	2.45534e+06	-3.9006e+06
301	Bareland	BL	2.45507e+06	-3.9004e+06
302	Bareland	BL	2.45937e+06	-3.90055e+06
303	Bareland	BL	2.45913e+06	-3.9006e+06
304	Bareland	BL	2.45512e+06	-3.90103e+06
305	Bareland	BL	2.45489e+06	-3.9011e+06
306	Bareland	BL	2.4555e+06	-3.90116e+06
307	Bareland	BL	2.45535e+06	-3.9014e+06
308	Bareland	BL	2.45492e+06	-3.90208e+06
309	Bareland	BL	2.45478e+06	-3.9022e+06
310	Bareland	BL	2.45464e+06	-3.90247e+06
311	Bareland	BL	2.4546e+06	-3.90288e+06
312	Bareland	BL	2.45064e+06	-3.90359e+06
313	Bareland	BL	2.44951e+06	-3.904e+06
314	Bareland	BL	2.44836e+06	-3.90426e+06
315	Bareland	BL	2.45933e+06	-3.90437e+06
316	Bareland	BL	2.45964e+06	-3.90438e+06
317	Bareland	BL	2.45982e+06	-3.90438e+06
318	Bareland	BL	2.46097e+06	-3.90429e+06
319	Bareland	BL	2.46179e+06	-3.90437e+06
320	Bareland	BL	2.44777e+06	-3.90442e+06
321	Bareland	BL	2.44759e+06	-3.9046e+06
322	Bareland	BL	2.43935e+06	-3.90501e+06
323	Bareland	BL	2.43976e+06	-3.90493e+06
324	Bareland	BL	2.43997e+06	-3.90492e+06
325	Bareland	BL	2.44011e+06	-3.90489e+06
326	Bareland	BL	2.44028e+06	-3.90487e+06
327	Bareland	BL	2.4405e+06	-3.90484e+06
328	Bareland	BL	2.4407e+06	-3.90484e+06
329	Bareland	BL	2.44029e+06	-3.90499e+06
330	Bareland	BL	2.44014e+06	-3.90497e+06
331	Bareland	BL	2.43004e+06	-3.9051e+06
332	Bareland	BL	2.45383e+06	-3.90507e+06
333	Bareland	BL	2.45367e+06	-3.90492e+06
334	Bareland	BL	2.44654e+06	-3.90527e+06
335	Bareland	BL	2.44632e+06	-3.9051e+06
336	Bareland	BL	2.44645e+06	-3.90534e+06
337	Bareland	BL	2.44654e+06	-3.90514e+06
338	Bareland	BL	2.44639e+06	-3.90523e+06
339	Bareland	BL	2.4374e+06	-3.90545e+06
340	Bareland	BL	2.43756e+06	-3.90548e+06
341	Bareland	BL	2.43775e+06	-3.90543e+06
342	Bareland	BL	2.43799e+06	-3.90541e+06
343	Bareland	BL	2.4379e+06	-3.90546e+06
344	Bareland	BL	2.4198e+06	-3.90579e+06
345	Bareland	BL	2.42978e+06	-3.90527e+06
346	Bareland	BL	2.44709e+06	-3.90556e+06
347	Bareland	BL	2.4474e+06	-3.90557e+06
348	Bareland	BL	2.43787e+06	-3.90583e+06
349	Bareland	BL	2.43762e+06	-3.90583e+06
350	Bareland	BL	2.43746e+06	-3.90586e+06
351	Bareland	BL	2.43778e+06	-3.90582e+06
352	Bareland	BL	2.43787e+06	-3.90592e+06
353	Bareland	BL	2.43762e+06	-3.90583e+06
354	Bareland	BL	2.43763e+06	-3.9059e+06
355	Bareland	BL	2.42092e+06	-3.90595e+06
356	Bareland	BL	2.42071e+06	-3.90614e+06
357	Bareland	BL	2.42136e+06	-3.90591e+06
358	Bareland	BL	2.41967e+06	-3.90598e+06
359	Bareland	BL	2.41901e+06	-3.90589e+06
360	Bareland	BL	2.4186e+06	-3.90587e+06
361	Bareland	BL	2.41824e+06	-3.90592e+06
362	Bareland	BL	2.41787e+06	-3.90598e+06
363	Bareland	BL	2.42057e+06	-3.90631e+06
364	Bareland	BL	2.42438e+06	-3.90612e+06
365	Bareland	BL	2.42458e+06	-3.90586e+06
366	Bareland	BL	2.42482e+06	-3.90599e+06
367	Bareland	BL	2.42756e+06	-3.90584e+06
368	Bareland	BL	2.42343e+06	-3.9067e+06
369	Bareland	BL	2.36796e+06	-3.91998e+06
370	Bareland	BL	2.36834e+06	-3.9205e+06
371	Bareland	BL	2.37371e+06	-3.9251e+06
372	Bareland	BL	2.3771e+06	-3.92509e+06
373	Bareland	BL	2.37749e+06	-3.92486e+06
374	Bareland	BL	2.37796e+06	-3.92485e+06
375	Bareland	BL	2.37858e+06	-3.92501e+06
376	Bareland	BL	2.36878e+06	-3.92574e+06
377	Bareland	BL	2.36925e+06	-3.9257e+06
378	Bareland	BL	2.37042e+06	-3.92567e+06
379	Bareland	BL	2.37086e+06	-3.92573e+06
380	Bareland	BL	2.37363e+06	-3.92541e+06
381	Bareland	BL	2.37865e+06	-3.92549e+06
382	Bareland	BL	2.37738e+06	-3.92561e+06
383	Bareland	BL	2.37738e+06	-3.92561e+06
384	Bareland	BL	2.36733e+06	-3.9261e+06
385	Bareland	BL	2.37109e+06	-3.92615e+06
386	Bareland	BL	2.37065e+06	-3.92619e+06
387	Bareland	BL	2.37854e+06	-3.9259e+06
388	Bareland	BL	2.3675e+06	-3.92649e+06
389	Bareland	BL	2.375e+06	-3.92643e+06
390	Bareland	BL	2.37084e+06	-3.92734e+06
391	Bareland	BL	2.37037e+06	-3.92728e+06
392	Bareland	BL	2.37106e+06	-3.92792e+06
393	Bareland	BL	2.51443e+06	-4.00451e+06
394	Bareland	BL	2.51506e+06	-4.00455e+06
395	Bareland	BL	2.51526e+06	-4.00459e+06
396	Bareland	BL	2.51563e+06	-4.00461e+06
397	Bareland	BL	2.51591e+06	-4.00467e+06
398	Bareland	BL	2.51623e+06	-4.00479e+06
399	Bareland	BL	2.51654e+06	-4.00487e+06
400	Bareland	BL	2.51658e+06	-4.00494e+06
401	Bareland	BL	2.5168e+06	-4.00495e+06
402	Bareland	BL	2.51699e+06	-4.00495e+06
403	Bareland	BL	2.51719e+06	-4.00495e+06
404	Bareland	BL	2.51719e+06	-4.00507e+06
405	Bareland	BL	2.51734e+06	-4.00503e+06
406	Bareland	BL	2.51713e+06	-4.00502e+06
407	Bareland	BL	2.51668e+06	-4.00489e+06
408	Bareland	BL	2.51755e+06	-4.00506e+06
409	Bareland	BL	2.51749e+06	-4.0051e+06
410	Bareland	BL	2.51766e+06	-4.00513e+06
411	Bareland	BL	2.51781e+06	-4.00513e+06
412	Bareland	BL	2.51796e+06	-4.0052e+06
413	Bareland	BL	2.51808e+06	-4.00516e+06
414	Bareland	BL	2.51839e+06	-4.00525e+06
415	Bareland	BL	2.51862e+06	-4.00531e+06
416	Bareland	BL	2.51882e+06	-4.00535e+06
417	Bareland	BL	2.51903e+06	-4.00534e+06
418	Bareland	BL	2.51919e+06	-4.00533e+06
419	Bareland	BL	2.51924e+06	-4.00541e+06
420	Bareland	BL	2.51951e+06	-4.00534e+06
421	Bareland	BL	2.51966e+06	-4.0054e+06
422	Bareland	BL	2.52005e+06	-4.00538e+06
423	Bareland	BL	2.52025e+06	-4.00544e+06
424	Bareland	BL	2.52056e+06	-4.00553e+06
425	Bareland	BL	2.52094e+06	-4.00559e+06
426	Bareland	BL	2.52115e+06	-4.00563e+06
427	Bareland	BL	2.53464e+06	-4.00882e+06
428	Bareland	BL	2.53482e+06	-4.00871e+06
429	Bareland	BL	2.53505e+06	-4.00864e+06
430	Bareland	BL	2.5343e+06	-4.00922e+06
431	Bareland	BL	2.53443e+06	-4.00901e+06
432	Bareland	BL	2.53768e+06	-4.009e+06
433	Bareland	BL	2.5334e+06	-4.00929e+06
434	Bareland	BL	2.53283e+06	-4.00915e+06
435	Bareland	BL	2.53243e+06	-4.00903e+06
436	Settlement	B	2.45184e+06	-3.89839e+06
437	Settlement	B	2.45206e+06	-3.89839e+06
438	Settlement	B	2.45206e+06	-3.89892e+06
439	Settlement	B	2.45127e+06	-3.89917e+06
440	Settlement	B	2.4512e+06	-3.89894e+06
441	Settlement	B	2.45185e+06	-3.89946e+06
442	Settlement	B	2.45167e+06	-3.89932e+06
443	Settlement	B	2.45169e+06	-3.89955e+06
444	Settlement	B	2.45159e+06	-3.89982e+06
445	Settlement	B	2.45188e+06	-3.89992e+06
446	Settlement	B	2.45243e+06	-3.90069e+06
447	Settlement	B	2.4525e+06	-3.90035e+06
448	Settlement	B	2.45223e+06	-3.90063e+06
449	Settlement	B	2.45231e+06	-3.90117e+06
450	Settlement	B	2.45253e+06	-3.9014e+06
451	Settlement	B	2.45249e+06	-3.90102e+06
452	Settlement	B	2.45245e+06	-3.90185e+06
453	Settlement	B	2.45273e+06	-3.90188e+06
454	Settlement	B	2.45251e+06	-3.90231e+06
455	Settlement	B	2.45237e+06	-3.90209e+06
456	Settlement	B	2.45238e+06	-3.90256e+06
457	Settlement	B	2.50912e+06	-3.93698e+06
458	Settlement	B	2.50866e+06	-3.93698e+06
459	Settlement	B	2.50798e+06	-3.93697e+06
460	Settlement	B	2.50829e+06	-3.93716e+06
461	Settlement	B	2.50716e+06	-3.93797e+06
462	Settlement	B	2.50693e+06	-3.93803e+06
463	Settlement	B	2.50728e+06	-3.93826e+06
464	Settlement	B	2.47071e+06	-3.94783e+06
465	Settlement	B	2.4713e+06	-3.94799e+06
466	Settlement	B	2.47095e+06	-3.94815e+06
467	Settlement	B	2.47219e+06	-3.94795e+06
468	Settlement	B	2.49706e+06	-3.94794e+06
469	Settlement	B	2.49692e+06	-3.94809e+06
470	Settlement	B	2.49732e+06	-3.94803e+06
471	Settlement	B	2.47071e+06	-3.94856e+06
472	Settlement	B	2.47127e+06	-3.94864e+06
473	Settlement	B	2.47224e+06	-3.94847e+06
474	Settlement	B	2.4964e+06	-3.94871e+06
475	Settlement	B	2.49714e+06	-3.94842e+06
476	Settlement	B	2.49821e+06	-3.94845e+06
477	Settlement	B	2.47089e+06	-3.94898e+06
478	Settlement	B	2.47071e+06	-3.94941e+06
479	Settlement	B	2.4703e+06	-3.94943e+06
480	Settlement	B	2.46987e+06	-3.94931e+06
481	Settlement	B	2.46974e+06	-3.94952e+06
482	Settlement	B	2.47239e+06	-3.94907e+06
483	Settlement	B	2.49673e+06	-3.94874e+06
484	Settlement	B	2.49654e+06	-3.94905e+06
485	Settlement	B	2.4983e+06	-3.94875e+06
486	Settlement	B	2.49846e+06	-3.94896e+06
487	Settlement	B	2.47063e+06	-3.94994e+06
488	Settlement	B	2.47046e+06	-3.94972e+06
489	Settlement	B	2.47205e+06	-3.94957e+06
490	Settlement	B	2.47259e+06	-3.95003e+06
491	Settlement	B	2.4698e+06	-3.95042e+06
492	Settlement	B	2.46942e+06	-3.95036e+06
493	Settlement	B	2.47038e+06	-3.95027e+06
494	Settlement	B	2.47223e+06	-3.95057e+06
495	Settlement	B	2.4717e+06	-3.95045e+06
496	Settlement	B	2.47754e+06	-3.95044e+06
497	Settlement	B	2.47053e+06	-3.95079e+06
498	Settlement	B	2.46999e+06	-3.95102e+06
499	Settlement	B	2.46961e+06	-3.95106e+06
500	Settlement	B	2.47066e+06	-3.95107e+06
501	Settlement	B	2.47235e+06	-3.95127e+06
502	Settlement	B	2.47493e+06	-3.95117e+06
503	Settlement	B	2.47641e+06	-3.951e+06
504	Settlement	B	2.46987e+06	-3.95133e+06
505	Settlement	B	2.47092e+06	-3.95144e+06
506	Settlement	B	2.4709e+06	-3.95184e+06
507	Settlement	B	2.47124e+06	-3.95171e+06
508	Settlement	B	2.47402e+06	-3.95166e+06
509	Settlement	B	2.47638e+06	-3.95154e+06
510	Settlement	B	2.47127e+06	-3.95203e+06
511	Settlement	B	2.47379e+06	-3.95225e+06
512	Settlement	B	2.4716e+06	-3.9525e+06
513	Settlement	B	2.4714e+06	-3.95291e+06
514	Settlement	B	2.54227e+06	-3.99386e+06
515	Settlement	B	2.54227e+06	-3.99386e+06
516	Settlement	B	2.54206e+06	-3.99411e+06
517	Settlement	B	2.54206e+06	-3.99404e+06
518	Settlement	B	2.54232e+06	-3.99435e+06
519	Settlement	B	2.54229e+06	-3.99432e+06
520	Settlement	B	2.54249e+06	-3.99428e+06
521	Settlement	B	2.54254e+06	-3.99411e+06
522	Settlement	B	2.54259e+06	-3.99396e+06
523	Settlement	B	2.54235e+06	-3.99442e+06
524	Settlement	B	2.54234e+06	-3.99455e+06
525	Settlement	B	2.54236e+06	-3.99453e+06
526	Settlement	B	2.50082e+06	-3.99822e+06
527	Settlement	B	2.4971e+06	-3.99888e+06
528	Settlement	B	2.49502e+06	-3.99924e+06
529	Settlement	B	2.50095e+06	-3.99899e+06
530	Settlement	B	2.49151e+06	-3.99933e+06
531	Settlement	B	2.50333e+06	-3.99916e+06
532	Settlement	B	2.50281e+06	-3.99942e+06
533	Settlement	B	2.49728e+06	-3.99991e+06
534	Settlement	B	2.49958e+06	-3.9997e+06
535	Settlement	B	2.49411e+06	-4.00034e+06
536	Settlement	B	2.49561e+06	-4.00012e+06
537	Settlement	B	2.50033e+06	-4.00011e+06
538	Settlement	B	2.49686e+06	-4.00069e+06
539	Settlement	B	2.50019e+06	-4.00112e+06
540	Settlement	B	2.51747e+06	-4.00064e+06
541	Settlement	B	2.4974e+06	-4.00138e+06
542	Settlement	B	2.50457e+06	-4.00125e+06
543	Settlement	B	2.51238e+06	-4.00159e+06
544	Settlement	B	2.51742e+06	-4.00111e+06
545	Settlement	B	2.51796e+06	-4.00113e+06
546	Settlement	B	2.51304e+06	-4.00175e+06
547	Settlement	B	2.51262e+06	-4.00196e+06
548	Settlement	B	2.51797e+06	-4.00171e+06
549	Settlement	B	2.51977e+06	-4.00204e+06
550	Settlement	B	2.50239e+06	-4.00313e+06
551	Settlement	B	2.50315e+06	-4.00383e+06
552	Settlement	B	2.50132e+06	-4.00363e+06
553	Settlement	B	2.51707e+06	-4.00441e+06
554	Settlement	B	2.51773e+06	-4.0045e+06
555	Settlement	B	2.51824e+06	-4.00477e+06
556	Settlement	B	2.51913e+06	-4.00481e+06
557	Settlement	B	2.53171e+06	-4.00509e+06
558	Settlement	B	2.53179e+06	-4.00524e+06
559	Settlement	B	2.53189e+06	-4.0051e+06
560	Settlement	B	2.53165e+06	-4.00523e+06
561	Settlement	B	2.52162e+06	-4.00528e+06
562	Settlement	B	2.52196e+06	-4.00529e+06
563	Settlement	B	2.52222e+06	-4.00536e+06
564	Settlement	B	2.50137e+06	-4.00748e+06
565	Settlement	B	2.53858e+06	-4.00703e+06
566	Settlement	B	2.53893e+06	-4.00722e+06
567	Settlement	B	2.53887e+06	-4.00755e+06
568	Settlement	B	2.53955e+06	-4.0076e+06
569	Settlement	B	2.53926e+06	-4.00724e+06
570	Settlement	B	2.53927e+06	-4.00757e+06
571	Settlement	B	2.54005e+06	-4.00783e+06
572	Settlement	B	2.54056e+06	-4.00795e+06
573	Settlement	B	2.54099e+06	-4.00799e+06
574	Settlement	B	2.53879e+06	-4.00821e+06
575	Settlement	B	2.53901e+06	-4.0085e+06
576	Settlement	B	2.53987e+06	-4.00851e+06
577	Settlement	B	2.46722e+06	-4.01532e+06
578	Settlement	B	2.45605e+06	-4.01656e+06
579	Settlement	B	2.4605e+06	-4.0181e+06
580	Settlement	B	2.4603e+06	-4.01801e+06
581	Vegetation	WV	2.39762e+06	-3.87884e+06
582	Vegetation	WV	2.39812e+06	-3.87918e+06
583	Vegetation	WV	2.41289e+06	-3.87998e+06
584	Vegetation	WV	2.41281e+06	-3.88047e+06
585	Vegetation	WV	2.39831e+06	-3.88101e+06
586	Vegetation	WV	2.39833e+06	-3.88165e+06
587	Vegetation	WV	2.40155e+06	-3.8823e+06
588	Vegetation	WV	2.40161e+06	-3.88199e+06
589	Vegetation	WV	2.37937e+06	-3.88316e+06
590	Vegetation	WV	2.38043e+06	-3.88293e+06
591	Vegetation	WV	2.38126e+06	-3.8829e+06
592	Vegetation	WV	2.38308e+06	-3.8829e+06
593	Vegetation	WV	2.40183e+06	-3.8832e+06
594	Vegetation	WV	2.37887e+06	-3.88372e+06
595	Vegetation	WV	2.40263e+06	-3.88384e+06
596	Vegetation	WV	2.37824e+06	-3.88403e+06
597	Vegetation	WV	2.4112e+06	-3.88433e+06
598	Vegetation	WV	2.40285e+06	-3.88438e+06
599	Vegetation	WV	2.40864e+06	-3.88614e+06
600	Vegetation	WV	2.398e+06	-3.89111e+06
601	Vegetation	WV	2.39878e+06	-3.89108e+06
602	Vegetation	WV	2.40616e+06	-3.89466e+06
603	Vegetation	WV	2.40579e+06	-3.89499e+06
604	Vegetation	WV	2.40699e+06	-3.89554e+06
605	Vegetation	WV	2.40653e+06	-3.89507e+06
606	Vegetation	WV	2.40627e+06	-3.89546e+06
607	Vegetation	WV	2.40738e+06	-3.8961e+06
608	Vegetation	WV	2.40675e+06	-3.89582e+06
609	Vegetation	WV	2.39001e+06	-3.89622e+06
610	Vegetation	WV	2.39038e+06	-3.89612e+06
611	Vegetation	WV	2.39238e+06	-3.89588e+06
612	Vegetation	WV	2.40714e+06	-3.89628e+06
613	Vegetation	WV	2.39014e+06	-3.89666e+06
614	Vegetation	WV	2.4084e+06	-3.89985e+06
615	Vegetation	WV	2.4236e+06	-3.90292e+06
616	Vegetation	WV	2.4059e+06	-3.90584e+06
617	Vegetation	WV	2.40495e+06	-3.90589e+06
618	Vegetation	WV	2.4044e+06	-3.90581e+06
619	Vegetation	WV	2.41454e+06	-3.90684e+06
620	Vegetation	WV	2.41528e+06	-3.90682e+06
621	Vegetation	WV	2.40551e+06	-3.9069e+06
622	Vegetation	WV	2.41078e+06	-3.90741e+06
623	Vegetation	WV	2.41117e+06	-3.90713e+06
624	Vegetation	WV	2.41148e+06	-3.90754e+06
625	Vegetation	WV	2.41235e+06	-3.90721e+06
626	Vegetation	WV	2.41304e+06	-3.90713e+06
627	Vegetation	WV	2.41345e+06	-3.90708e+06
628	Vegetation	WV	2.40625e+06	-3.90731e+06
629	Vegetation	WV	2.40436e+06	-3.90749e+06
630	Vegetation	WV	2.40492e+06	-3.9077e+06
631	Vegetation	WV	2.40453e+06	-3.90811e+06
632	Vegetation	WV	2.38121e+06	-3.91306e+06
633	Vegetation	WV	2.37819e+06	-3.91344e+06
634	Vegetation	WV	2.37358e+06	-3.91439e+06
635	Vegetation	WV	2.36659e+06	-3.91515e+06
636	Vegetation	WV	2.37009e+06	-3.91496e+06
637	Vegetation	WV	2.49357e+06	-3.91557e+06
638	Vegetation	WV	2.37072e+06	-3.91837e+06
639	Vegetation	WV	2.48476e+06	-3.92975e+06
640	Vegetation	WV	2.48224e+06	-3.93071e+06
641	Vegetation	WV	2.45926e+06	-3.93262e+06
642	Vegetation	WV	2.44553e+06	-3.93494e+06
643	Vegetation	WV	2.48716e+06	-3.9393e+06
644	Vegetation	WV	2.44622e+06	-3.94094e+06
645	Vegetation	WV	2.44828e+06	-3.94559e+06
646	Vegetation	WV	2.48636e+06	-3.94682e+06
647	Vegetation	WV	2.48636e+06	-3.94682e+06
648	Vegetation	WV	2.48522e+06	-3.94695e+06
649	Vegetation	WV	2.48522e+06	-3.94695e+06
650	Vegetation	WV	2.48522e+06	-3.94695e+06
651	Vegetation	WV	2.48476e+06	-3.94695e+06
652	Vegetation	WV	2.48476e+06	-3.94695e+06
653	Vegetation	WV	2.48099e+06	-3.94859e+06
654	Vegetation	WV	2.49219e+06	-3.95173e+06
655	Vegetation	WV	2.48853e+06	-3.95269e+06
656	Vegetation	WV	2.48556e+06	-3.95296e+06
657	Vegetation	WV	2.44999e+06	-3.96746e+06
658	Vegetation	WV	2.5058e+06	-3.9665e+06
659	Vegetation	WV	2.50352e+06	-3.96965e+06
660	Vegetation	WV	2.50043e+06	-3.96952e+06
661	Vegetation	WV	2.44999e+06	-3.97157e+06
662	Vegetation	WV	2.49768e+06	-3.97102e+06
663	Vegetation	WV	2.45788e+06	-3.97595e+06
664	Vegetation	WV	2.44485e+06	-3.9765e+06
665	Vegetation	WV	2.46509e+06	-3.97636e+06
666	Vegetation	WV	2.4636e+06	-3.97691e+06
667	Vegetation	WV	2.37009e+06	-3.9789e+06
668	Vegetation	WV	2.37247e+06	-3.98004e+06
669	Vegetation	WV	2.37597e+06	-3.98061e+06
670	Vegetation	WV	2.46269e+06	-3.98033e+06
671	Vegetation	WV	2.34021e+06	-3.98156e+06
672	Vegetation	WV	2.34291e+06	-3.98156e+06
673	Vegetation	WV	2.46555e+06	-3.98143e+06
674	Vegetation	WV	2.37279e+06	-3.98251e+06
675	Vegetation	WV	2.34593e+06	-3.98366e+06
676	Vegetation	WV	2.5193e+06	-3.98349e+06
677	Vegetation	WV	2.34307e+06	-3.98671e+06
678	Vegetation	WV	2.44576e+06	-3.98719e+06
679	Vegetation	WV	2.51541e+06	-3.98636e+06
680	Vegetation	WV	2.53046e+06	-3.98655e+06
681	Vegetation	WV	2.50603e+06	-3.98774e+06
682	Vegetation	WV	2.51026e+06	-3.9876e+06
683	Vegetation	WV	2.51298e+06	-3.98731e+06
684	Vegetation	WV	2.53221e+06	-3.98808e+06
685	Vegetation	WV	2.50329e+06	-3.98938e+06
686	Vegetation	WV	2.516e+06	-3.99074e+06
687	Vegetation	WV	2.51711e+06	-3.99303e+06
688	Vegetation	WV	2.51536e+06	-3.99379e+06
689	Vegetation	WV	2.516e+06	-3.99608e+06
690	Vegetation	WV	2.51807e+06	-3.99589e+06
691	Tamarix	T	2.44652e+06	-3.84075e+06
692	Tamarix	T	2.44662e+06	-3.8407e+06
693	Tamarix	T	2.44647e+06	-3.84083e+06
694	Tamarix	T	2.44682e+06	-3.84148e+06
695	Tamarix	T	2.44678e+06	-3.84141e+06
696	Tamarix	T	2.44675e+06	-3.84139e+06
697	Tamarix	T	2.44673e+06	-3.84134e+06
698	Tamarix	T	2.44668e+06	-3.84129e+06
699	Tamarix	T	2.44682e+06	-3.84149e+06
700	Tamarix	T	2.44675e+06	-3.8414e+06
701	Tamarix	T	2.44675e+06	-3.84141e+06
702	Tamarix	T	2.44682e+06	-3.84149e+06
703	Tamarix	T	2.44668e+06	-3.84129e+06
704	Tamarix	T	2.44664e+06	-3.89399e+06
705	Tamarix	T	2.44673e+06	-3.89406e+06
706	Tamarix	T	2.44698e+06	-3.89379e+06
707	Tamarix	T	2.44699e+06	-3.89384e+06
708	Tamarix	T	2.44697e+06	-3.89385e+06
709	Tamarix	T	2.44681e+06	-3.89401e+06
710	Tamarix	T	2.44664e+06	-3.89395e+06
711	Tamarix	T	2.44643e+06	-3.89387e+06
712	Tamarix	T	2.44603e+06	-3.89384e+06
713	Tamarix	T	2.44578e+06	-3.8939e+06
714	Tamarix	T	2.4457e+06	-3.89399e+06
715	Tamarix	T	2.4471e+06	-3.89383e+06
716	Tamarix	T	2.44742e+06	-3.89385e+06
717	Tamarix	T	2.44758e+06	-3.89381e+06
718	Tamarix	T	2.44742e+06	-3.89385e+06
719	Tamarix	T	2.44742e+06	-3.89385e+06
720	Tamarix	T	2.44758e+06	-3.89381e+06
721	Tamarix	T	2.44758e+06	-3.89381e+06
722	Tamarix	T	2.44758e+06	-3.89382e+06
723	Tamarix	T	2.44643e+06	-3.89387e+06
724	Tamarix	T	2.44643e+06	-3.89387e+06
725	Tamarix	T	2.44643e+06	-3.89387e+06
726	Tamarix	T	2.44643e+06	-3.89387e+06
727	Tamarix	T	2.44646e+06	-3.89391e+06
728	Tamarix	T	2.44646e+06	-3.89391e+06
729	Tamarix	T	2.44664e+06	-3.89398e+06
730	Tamarix	T	2.44664e+06	-3.89394e+06
731	Tamarix	T	2.44664e+06	-3.89395e+06
732	Tamarix	T	2.44674e+06	-3.89406e+06
733	Tamarix	T	2.52647e+06	-3.93919e+06
734	Tamarix	T	2.52647e+06	-3.93919e+06
735	Tamarix	T	2.52644e+06	-3.93915e+06
736	Tamarix	T	2.52647e+06	-3.93906e+06
737	Tamarix	T	2.52638e+06	-3.93891e+06
738	Tamarix	T	2.52634e+06	-3.93876e+06
739	Tamarix	T	2.52651e+06	-3.93877e+06
740	Tamarix	T	2.52665e+06	-3.93868e+06
741	Tamarix	T	2.52673e+06	-3.93867e+06
742	Tamarix	T	2.52673e+06	-3.93876e+06
743	Tamarix	T	2.52664e+06	-3.93882e+06
744	Tamarix	T	2.52647e+06	-3.93918e+06
745	Tamarix	T	2.52647e+06	-3.9392e+06
746	Tamarix	T	2.52689e+06	-3.93904e+06
747	Tamarix	T	2.52707e+06	-3.93893e+06
748	Tamarix	T	2.52725e+06	-3.93872e+06
749	Tamarix	T	2.52775e+06	-3.93865e+06
750	Tamarix	T	2.5279e+06	-3.93872e+06
751	Tamarix	T	2.52792e+06	-3.93868e+06
752	Tamarix	T	2.52793e+06	-3.93881e+06
753	Tamarix	T	2.52786e+06	-3.93881e+06
754	Tamarix	T	2.52775e+06	-3.93884e+06
755	Tamarix	T	2.52763e+06	-3.93886e+06
756	Tamarix	T	2.52707e+06	-3.93894e+06
757	Tamarix	T	2.52703e+06	-3.93911e+06
758	Tamarix	T	2.52695e+06	-3.93907e+06
759	Tamarix	T	2.52686e+06	-3.93904e+06
760	Tamarix	T	2.52642e+06	-3.93916e+06
761	Tamarix	T	2.52647e+06	-3.93921e+06
762	Tamarix	T	2.52793e+06	-3.93881e+06
763	Tamarix	T	2.52793e+06	-3.93881e+06
764	Tamarix	T	2.52793e+06	-3.93881e+06
765	Tamarix	T	2.52793e+06	-3.93881e+06
766	Tamarix	T	2.52793e+06	-3.93881e+06
767	Tamarix	T	2.52793e+06	-3.93881e+06
768	Tamarix	T	2.52793e+06	-3.93881e+06
769	Tamarix	T	2.52647e+06	-3.93918e+06
770	Tamarix	T	2.52648e+06	-3.93918e+06
771	Tamarix	T	2.52648e+06	-3.93918e+06
772	Tamarix	T	2.52635e+06	-3.93926e+06
773	Tamarix	T	2.52635e+06	-3.93926e+06
774	Tamarix	T	2.52634e+06	-3.93934e+06
775	Tamarix	T	2.52627e+06	-3.93935e+06
776	Tamarix	T	2.52619e+06	-3.93935e+06
777	Tamarix	T	2.52605e+06	-3.93937e+06
778	Tamarix	T	2.52596e+06	-3.93937e+06
779	Tamarix	T	2.52572e+06	-3.93932e+06
780	Tamarix	T	2.52564e+06	-3.93931e+06
781	Tamarix	T	2.52555e+06	-3.93938e+06
782	Tamarix	T	2.52579e+06	-3.93939e+06
783	Tamarix	T	2.52652e+06	-3.93925e+06
784	Tamarix	T	2.52653e+06	-3.93932e+06
785	Tamarix	T	2.52614e+06	-3.93937e+06
786	Tamarix	T	2.52619e+06	-3.93935e+06
787	Tamarix	T	2.52619e+06	-3.93936e+06
788	Tamarix	T	2.52634e+06	-3.93935e+06
789	Tamarix	T	2.52627e+06	-3.93935e+06
790	Waterbody	W	2.4505e+06	-3.82004e+06
791	Waterbody	W	2.45008e+06	-3.82026e+06
792	Waterbody	W	2.44972e+06	-3.82048e+06
793	Waterbody	W	2.44931e+06	-3.82093e+06
794	Waterbody	W	2.45005e+06	-3.82059e+06
795	Waterbody	W	2.4497e+06	-3.82097e+06
796	Waterbody	W	2.44971e+06	-3.82155e+06
797	Waterbody	W	2.44935e+06	-3.82203e+06
798	Waterbody	W	2.44898e+06	-3.82201e+06
799	Waterbody	W	2.33706e+06	-3.90752e+06
800	Waterbody	W	2.33656e+06	-3.90801e+06
801	Waterbody	W	2.33556e+06	-3.90809e+06
802	Waterbody	W	2.40917e+06	-3.90724e+06
803	Waterbody	W	2.40846e+06	-3.90802e+06
804	Waterbody	W	2.33621e+06	-3.90912e+06
805	Waterbody	W	2.40821e+06	-3.90871e+06
806	Waterbody	W	2.33675e+06	-3.90964e+06
807	Waterbody	W	2.41135e+06	-3.9089e+06
808	Waterbody	W	2.33648e+06	-3.91019e+06
809	Waterbody	W	2.33761e+06	-3.91026e+06
810	Waterbody	W	2.40817e+06	-3.9094e+06
811	Waterbody	W	2.41053e+06	-3.90958e+06
812	Waterbody	W	2.41221e+06	-3.90948e+06
813	Waterbody	W	2.41229e+06	-3.9098e+06
814	Waterbody	W	2.40828e+06	-3.91032e+06
815	Waterbody	W	2.40813e+06	-3.91072e+06
816	Waterbody	W	2.4098e+06	-3.91087e+06
817	Waterbody	W	2.40814e+06	-3.91129e+06
818	Waterbody	W	2.4087e+06	-3.91142e+06
819	Waterbody	W	2.40873e+06	-3.91205e+06
820	Waterbody	W	2.40827e+06	-3.91247e+06
821	Waterbody	W	2.5036e+06	-3.93711e+06
822	Waterbody	W	2.50396e+06	-3.93711e+06
823	Waterbody	W	2.51093e+06	-3.93656e+06
824	Waterbody	W	2.51101e+06	-3.93661e+06
825	Waterbody	W	2.50781e+06	-3.93708e+06
826	Waterbody	W	2.50748e+06	-3.93723e+06
827	Waterbody	W	2.5026e+06	-3.93798e+06
828	Waterbody	W	2.50272e+06	-3.93803e+06
829	Waterbody	W	2.50284e+06	-3.93808e+06
830	Waterbody	W	2.50481e+06	-3.93778e+06
831	Waterbody	W	2.50476e+06	-3.93781e+06
832	Waterbody	W	2.51412e+06	-3.93809e+06
833	Waterbody	W	2.51403e+06	-3.93804e+06
834	Waterbody	W	2.51409e+06	-3.93806e+06
835	Waterbody	W	2.51831e+06	-3.93983e+06
836	Waterbody	W	2.51811e+06	-3.93962e+06
837	Waterbody	W	2.51788e+06	-3.93982e+06
838	Waterbody	W	2.51906e+06	-3.93974e+06
839	Waterbody	W	2.50977e+06	-3.93989e+06
840	Waterbody	W	2.51464e+06	-3.9402e+06
841	Waterbody	W	2.51493e+06	-3.93996e+06
842	Waterbody	W	2.51519e+06	-3.94026e+06
843	Waterbody	W	2.51584e+06	-3.94028e+06
844	Waterbody	W	2.51655e+06	-3.94014e+06
845	Waterbody	W	2.51741e+06	-3.94003e+06
846	Waterbody	W	2.51785e+06	-3.94013e+06
847	Waterbody	W	2.51734e+06	-3.94033e+06
848	Waterbody	W	2.51689e+06	-3.94034e+06
849	Waterbody	W	2.51941e+06	-3.94009e+06
850	Waterbody	W	2.52012e+06	-3.94007e+06
851	Waterbody	W	2.52125e+06	-3.94039e+06
852	Waterbody	W	2.50998e+06	-3.94e+06
853	Waterbody	W	2.5163e+06	-3.94059e+06
854	Waterbody	W	2.5164e+06	-3.94083e+06
855	Waterbody	W	2.52061e+06	-3.9406e+06
856	Waterbody	W	2.51964e+06	-3.94048e+06
857	Waterbody	W	2.49435e+06	-3.94409e+06
858	Waterbody	W	2.49432e+06	-3.94405e+06
859	Waterbody	W	2.49366e+06	-3.94454e+06
860	Waterbody	W	2.494e+06	-3.94435e+06
861	Waterbody	W	2.49415e+06	-3.94423e+06
862	Waterbody	W	2.49373e+06	-3.94456e+06
863	Waterbody	W	2.494e+06	-3.94432e+06
864	Waterbody	W	2.49418e+06	-3.94419e+06
865	Waterbody	W	2.49352e+06	-3.94485e+06
866	Waterbody	W	2.49363e+06	-3.95001e+06
867	Waterbody	W	2.49375e+06	-3.95001e+06
868	Waterbody	W	2.53156e+06	-4.0035e+06
869	Waterbody	W	2.52837e+06	-4.00375e+06
870	Waterbody	W	2.5326e+06	-4.00396e+06
871	Waterbody	W	2.53396e+06	-4.00408e+06
872	Waterbody	W	2.53563e+06	-4.00383e+06
873	Waterbody	W	2.528e+06	-4.00409e+06
874	Waterbody	W	2.52864e+06	-4.00418e+06
875	Waterbody	W	2.53454e+06	-4.00471e+06
876	Waterbody	W	2.53384e+06	-4.00474e+06
877	Waterbody	W	2.53303e+06	-4.005e+06
878	Waterbody	W	2.53288e+06	-4.00544e+06
879	Waterbody	W	2.53928e+06	-4.0049e+06
880	Waterbody	W	2.53485e+06	-4.00721e+06
881	Waterbody	W	2.53528e+06	-4.00761e+06
882	Waterbody	W	2.51192e+06	-4.00995e+06
883	Waterbody	W	2.52175e+06	-4.01117e+06
884	Waterbody	W	2.50672e+06	-4.01227e+06
885	Waterbody	W	2.53317e+06	-4.01245e+06
886	Waterbody	W	2.53884e+06	-4.01428e+06
887	Waterbody	W	2.48425e+06	-4.01557e+06
888	Waterbody	W	2.50019e+06	-4.01565e+06
889	Waterbody	W	2.49188e+06	-4.01623e+06
890	Waterbody	W	2.47781e+06	-4.01702e+06
891	Waterbody	W	2.52288e+06	-4.01736e+06
892	Waterbody	W	2.46947e+06	-4.01807e+06
893	Waterbody	W	2.51724e+06	-4.01871e+06
894	Waterbody	W	2.46702e+06	-4.01923e+06
895	Waterbody	W	2.47883e+06	-4.02178e+06
896	Waterbody	W	2.48521e+06	-4.02167e+06
897	Waterbody	W	2.49272e+06	-4.02321e+06
898	Waterbody	W	2.50305e+06	-4.02407e+06
899	Waterbody	W	2.51222e+06	-4.02408e+06
900	Waterbody	W	2.53376e+06	-4.02419e+06
901	Grassland	GL	2.54015e+06	-3.91202e+06
902	Grassland	GL	2.54023e+06	-3.91203e+06
903	Grassland	GL	2.54137e+06	-3.91201e+06
904	Grassland	GL	2.5414e+06	-3.91206e+06
905	Grassland	GL	2.54184e+06	-3.91199e+06
906	Grassland	GL	2.54209e+06	-3.912e+06
907	Grassland	GL	2.54303e+06	-3.91195e+06
908	Grassland	GL	2.54316e+06	-3.91196e+06
909	Grassland	GL	2.5433e+06	-3.91197e+06
910	Grassland	GL	2.5435e+06	-3.9119e+06
911	Grassland	GL	2.5436e+06	-3.91185e+06
912	Grassland	GL	2.54328e+06	-3.9117e+06
913	Grassland	GL	2.54318e+06	-3.91172e+06
914	Grassland	GL	2.54476e+06	-3.91189e+06
915	Grassland	GL	2.54486e+06	-3.9118e+06
916	Grassland	GL	2.54497e+06	-3.91192e+06
917	Grassland	GL	2.54492e+06	-3.91199e+06
918	Grassland	GL	2.54527e+06	-3.91188e+06
919	Grassland	GL	2.54536e+06	-3.91186e+06
920	Grassland	GL	2.5453e+06	-3.91195e+06
921	Grassland	GL	2.54011e+06	-3.91257e+06
922	Grassland	GL	2.53983e+06	-3.91263e+06
923	Grassland	GL	2.53993e+06	-3.91261e+06
924	Grassland	GL	2.54149e+06	-3.91236e+06
925	Grassland	GL	2.48313e+06	-3.91644e+06
926	Grassland	GL	2.48212e+06	-3.91633e+06
927	Grassland	GL	2.4829e+06	-3.91678e+06
928	Grassland	GL	2.47893e+06	-3.91713e+06
929	Grassland	GL	2.48472e+06	-3.91692e+06
930	Grassland	GL	2.48386e+06	-3.91714e+06
931	Grassland	GL	2.48511e+06	-3.91824e+06
932	Grassland	GL	2.48402e+06	-3.91787e+06
933	Grassland	GL	2.49197e+06	-3.91889e+06
934	Grassland	GL	2.49238e+06	-3.91891e+06
935	Grassland	GL	2.41305e+06	-3.92998e+06
936	Grassland	GL	2.41352e+06	-3.92999e+06
937	Grassland	GL	2.41356e+06	-3.93018e+06
938	Grassland	GL	2.41345e+06	-3.93018e+06
939	Grassland	GL	2.41347e+06	-3.93001e+06
940	Grassland	GL	2.41341e+06	-3.93063e+06
941	Grassland	GL	2.41337e+06	-3.93085e+06
942	Grassland	GL	2.41349e+06	-3.93098e+06
943	Grassland	GL	2.41339e+06	-3.93119e+06
944	Grassland	GL	2.39335e+06	-3.9329e+06
945	Grassland	GL	2.39334e+06	-3.93309e+06
946	Grassland	GL	2.39344e+06	-3.93337e+06
947	Grassland	GL	2.39342e+06	-3.93359e+06
948	Grassland	GL	2.39281e+06	-3.93347e+06
949	Grassland	GL	2.39272e+06	-3.93324e+06
950	Grassland	GL	2.39269e+06	-3.93344e+06
951	Grassland	GL	2.39469e+06	-3.93334e+06
952	Grassland	GL	2.39481e+06	-3.93345e+06
953	Grassland	GL	2.39499e+06	-3.93357e+06
954	Grassland	GL	2.39513e+06	-3.93348e+06
955	Grassland	GL	2.39513e+06	-3.93348e+06
956	Grassland	GL	2.40194e+06	-3.93353e+06
957	Grassland	GL	2.39552e+06	-3.9337e+06
958	Grassland	GL	2.39563e+06	-3.93381e+06
959	Grassland	GL	2.3952e+06	-3.93393e+06
960	Grassland	GL	2.39529e+06	-3.93416e+06
961	Grassland	GL	2.4014e+06	-3.93361e+06
962	Grassland	GL	2.40131e+06	-3.93378e+06
963	Grassland	GL	2.40146e+06	-3.93384e+06
964	Grassland	GL	2.40132e+06	-3.93361e+06
965	Grassland	GL	2.40082e+06	-3.93408e+06
966	Grassland	GL	2.40096e+06	-3.93411e+06
967	Grassland	GL	2.40191e+06	-3.93375e+06
968	Grassland	GL	2.40161e+06	-3.93376e+06
969	Grassland	GL	2.40328e+06	-3.93358e+06
970	Grassland	GL	2.39529e+06	-3.93445e+06
971	Grassland	GL	2.39488e+06	-3.93424e+06
972	Grassland	GL	2.39609e+06	-3.93434e+06
973	Grassland	GL	2.39582e+06	-3.93423e+06
974	Grassland	GL	2.3981e+06	-3.93423e+06
975	Grassland	GL	2.39908e+06	-3.93465e+06
976	Grassland	GL	2.40068e+06	-3.93434e+06
977	Grassland	GL	2.40121e+06	-3.93413e+06
978	Grassland	GL	2.40121e+06	-3.93426e+06
979	Grassland	GL	2.40094e+06	-3.9344e+06
980	Grassland	GL	2.401e+06	-3.93451e+06
981	Grassland	GL	2.40186e+06	-3.93438e+06
982	Grassland	GL	2.40207e+06	-3.93468e+06
983	Grassland	GL	2.40223e+06	-3.93465e+06
984	Grassland	GL	2.40243e+06	-3.93456e+06
985	Grassland	GL	2.39771e+06	-3.93511e+06
986	Grassland	GL	2.39958e+06	-3.93476e+06
987	Grassland	GL	2.40175e+06	-3.93488e+06
988	Grassland	GL	2.40194e+06	-3.93512e+06
989	Grassland	GL	2.39868e+06	-3.93581e+06
990	Grassland	GL	2.39854e+06	-3.93577e+06
991	Grassland	GL	2.40029e+06	-3.93585e+06
992	Grassland	GL	2.40002e+06	-3.93556e+06
993	Grassland	GL	2.40015e+06	-3.93556e+06
994	Grassland	GL	2.40201e+06	-3.93536e+06
995	Grassland	GL	2.39968e+06	-3.93615e+06
996	Grassland	GL	2.39986e+06	-3.93623e+06
997	Grassland	GL	2.39882e+06	-3.93605e+06
998	Grassland	GL	2.39859e+06	-3.93597e+06
999	Grassland	GL	2.39875e+06	-3.93606e+06
1000	Grassland	GL	2.39907e+06	-3.93619e+06
1001	Grassland	GL	2.39987e+06	-3.93639e+06
1002	Grassland	GL	2.40039e+06	-3.93631e+06
1003	Grassland	GL	2.40056e+06	-3.93622e+06
1004	Grassland	GL	2.40066e+06	-3.93614e+06
1005	Grassland	GL	2.40009e+06	-3.93645e+06
1006	Grassland	GL	2.43852e+06	-3.93885e+06
1007	Grassland	GL	2.43637e+06	-3.93894e+06
1008	Grassland	GL	2.43608e+06	-3.93891e+06
1009	Grassland	GL	2.4359e+06	-3.93859e+06
1010	Grassland	GL	2.4327e+06	-3.93873e+06
1011	Grassland	GL	2.43267e+06	-3.939e+06
1012	Grassland	GL	2.43228e+06	-3.939e+06
1013	Grassland	GL	2.43099e+06	-3.939e+06
1014	Grassland	GL	2.43114e+06	-3.93896e+06
1015	Grassland	GL	2.43851e+06	-3.93904e+06
1016	Grassland	GL	2.43874e+06	-3.93923e+06
1017	Grassland	GL	2.43886e+06	-3.93935e+06
1018	Grassland	GL	2.4381e+06	-3.93939e+06
1019	Grassland	GL	2.43809e+06	-3.93924e+06
1020	Grassland	GL	2.43696e+06	-3.93935e+06
1021	Grassland	GL	2.43698e+06	-3.93921e+06
1022	Grassland	GL	2.43269e+06	-3.93921e+06
1023	Grassland	GL	2.43269e+06	-3.9394e+06
1024	Grassland	GL	2.4324e+06	-3.93935e+06
1025	Grassland	GL	2.43227e+06	-3.93917e+06
1026	Grassland	GL	2.43103e+06	-3.93942e+06
1027	Grassland	GL	2.43097e+06	-3.9393e+06
1028	Grassland	GL	2.43035e+06	-3.93908e+06
1029	Grassland	GL	2.43895e+06	-3.93977e+06
1030	Grassland	GL	2.43849e+06	-3.93964e+06
1031	Grassland	GL	2.43849e+06	-3.93964e+06
1032	Grassland	GL	2.43118e+06	-3.93991e+06
1033	Grassland	GL	2.43112e+06	-3.93968e+06
1034	Grassland	GL	2.43682e+06	-3.94116e+06
1035	Grassland	GL	2.43826e+06	-3.94155e+06
1036	Grassland	GL	2.43822e+06	-3.94173e+06
1037	Grassland	GL	2.4369e+06	-3.94127e+06
1038	Grassland	GL	2.43675e+06	-3.9414e+06
1039	Grassland	GL	2.53804e+06	-3.9546e+06
1040	Grassland	GL	2.53774e+06	-3.95459e+06
1041	Grassland	GL	2.53952e+06	-3.9546e+06
1042	Grassland	GL	2.52991e+06	-3.95444e+06
1043	Grassland	GL	2.52969e+06	-3.95449e+06
1044	Grassland	GL	2.54124e+06	-3.95457e+06
1045	Grassland	GL	2.53974e+06	-3.95473e+06
1046	Grassland	GL	2.53064e+06	-3.95553e+06
1047	Grassland	GL	2.54622e+06	-3.95552e+06
1048	Grassland	GL	2.53338e+06	-3.95685e+06
1049	Grassland	GL	2.54473e+06	-3.95687e+06
1050	Grassland	GL	2.53349e+06	-3.95707e+06
1051	Grassland	GL	2.53391e+06	-3.95715e+06
1052	Grassland	GL	2.54491e+06	-3.95716e+06
1053	Grassland	GL	2.54532e+06	-3.95694e+06
1054	Grassland	GL	2.55203e+06	-3.95883e+06
1055	Grassland	GL	2.55303e+06	-3.95917e+06
1056	Grassland	GL	2.47168e+06	-3.98469e+06
1057	Grassland	GL	2.46487e+06	-3.98818e+06
1058	Grassland	GL	2.47575e+06	-3.98815e+06
1059	Grassland	GL	2.53849e+06	-3.99373e+06
1060	Tamarix	T	2.48087e+06	-3.81436e+06
